1                    **Structure and dynamics of the SARS-CoV-2 envelope protein monomer**

2

3    Alexander Kuzmin<sup>1</sup>, Philipp Orekhov<sup>1,2</sup>, Roman Astashkin<sup>1,3</sup>, Valentin Gordeliy<sup>1,3,4,5</sup>, Ivan Gushchin<sup>1,\*</sup>

4

5    <sup>1</sup> Research Center for Molecular Mechanisms of Aging and Age-related Diseases, Moscow Institute of  
6    Physics and Technology, Dolgoprudny, Russia

7    <sup>2</sup> Faculty of Biology, M.V. Lomonosov Moscow State University, Moscow, Russia

8    <sup>3</sup> Institut de Biologie Structurale (IBS), Université Grenoble Alpes, CEA, CNRS, Grenoble, France

9    <sup>4</sup> Institute of Biological Information Processing (IBI-7: Structural Biochemistry), Forschungszentrum  
10    Jülich GmbH, Jülich, Germany

11    <sup>5</sup> JuStruct: Jülich Center for Structural Biology, Forschungszentrum Jülich GmbH, Jülich, Germany.

12

13    E-mail for correspondence: [ivan.gushchin@phystech.edu](mailto:ivan.gushchin@phystech.edu)

14

15

16           **Abstract**

17           Coronaviruses, especially SARS-CoV-2, present an ongoing threat for human wellbeing.  
18   Consequently, elucidation of molecular determinants of their function and interaction with host is an  
19   important task. Whereas some of the coronaviral proteins are extensively characterized, others remain  
20   understudied. Here, we use molecular dynamics simulations to analyze the structure and dynamics of  
21   the SARS-CoV-2 envelope (E) protein (a viroporin) in the monomeric form. The protein consists of the  
22   hydrophobic  $\alpha$ -helical transmembrane domain (TMD) and amphiphilic  $\alpha$ -helices H2 and H3, connected  
23   by flexible linkers. We show that TMD has a preferable orientation in the membrane, while H2 and H3  
24   reside at the membrane surface. Orientation of H2 is strongly influenced by palmitoylation of cysteines  
25   Cys40, Cys43 and Cys44. Glycosylation of Asn66 affects the orientation of H3. We also observe that  
26   the E protein both generates and senses the membrane curvature, preferably localizing with the C-  
27   terminus at the convex regions of the membrane. This may be favorable for assembly of the E protein  
28   oligomers, whereas induction of curvature may facilitate budding of the viral particles. The presented  
29   results may be helpful for better understanding of the function of coronaviral E protein and viroporins  
30   in general, and for overcoming the ongoing SARS-CoV-2 pandemic.

31

32           *Keywords: SARS-CoV-2, membrane protein, envelope protein, molecular dynamics,*  
33   *palmitoylation, glycosylation, membrane curvature*

## 34           **Introduction**

35           Coronaviruses (CoVs) (order *Nidovirales*, family *Coronaviridae*, subfamily *Coronavirinae*)  
36 are enveloped viruses with a positive sense, single-stranded RNA genome of ~30 kb, one of the largest  
37 among RNA viruses [1]. CoVs infect birds and mammals, causing a variety of fatal diseases. They can  
38 also infect humans and cause diseases ranging from the common cold to acute respiratory distress  
39 syndrome. Highly pathogenic human coronaviruses include Severe Acute Respiratory Syndrome  
40 (SARS)-CoV, Middle Eastern Respiratory Syndrome (MERS)-CoV and SARS-CoV-2 [2,3]. The  
41 outbreaks of SARS-CoV in 2002/3 and MERS-CoV in 2012 led to epidemics. SARS-CoV-2 emerged  
42 at the end of December, 2019 causing a pandemic of the coronavirus disease 2019 (COVID-19), which  
43 is a novel life-threatening form of atypical pneumonia [4].

44           Antiviral strategies may be roughly divided into two classes: the measures aimed at prevention  
45 of the spread of infections, and treatment of patients who have already contracted the disease.  
46 Development of both kinds of strategies benefits greatly from understanding the virus physiology, and  
47 in particular the structure and function of viral proteins. Structural biology studies of SARS-CoV-2  
48 have seen rapid progress since the beginning of the pandemic [5]. Whereas most of the key information  
49 was obtained using experimental techniques, such as cryoelectron microscopy, X-ray crystallography  
50 or NMR, computational approaches were key for some of the findings [6,7]. Among the most notable  
51 examples are detailed simulations of dynamics of the most important viral proteins [6,8,9] or even the  
52 whole virion [10], early generation of atomic models for all SARS-CoV-2 proteins [11], and high-  
53 throughput virtual ligand screening of viral protease inhibitors [12,13].

54           The genomes of all coronaviruses encode four major structural proteins: the spike (S) protein,  
55 nucleocapsid (N) protein, membrane (M) protein, and the envelope (E) protein [14]. The S protein is  
56 involved in the host recognition, attachment and cell fusion. The N protein is involved in packaging of  
57 the RNA genome and formation of the nucleocapsid. The M protein directs the assembly process of  
58 virions through interactions with the other structural proteins and defines the shape of the viral envelope.  
59 The E protein is possibly the most mysterious of them since it is associated with the assembly of virions,  
60 effective virion transfer along the secretory pathway as well as a reduced stress response by the host  
61 cell. Generally, it promotes virus fitness and pathogenesis [15].

62 Overall, coronaviral E proteins are small, integral membrane proteins of 75–109 amino acids,  
63 which have at least one helical transmembrane domain (TMD) and a long amphiphilic region  
64 comprising one or two  $\alpha$ -helices at the C-terminus [16,17]. SARS-CoV-2 E protein consists of 75 amino  
65 acids, and its sequence is 95% and 36% identical to those of SARS-CoV and MERS-CoV E proteins,  
66 respectively. Given the sequence identity and the available data, SARS-CoV and SARS-CoV-2 E  
67 proteins appear to be very similar in their structure and function, and most of the findings about the  
68 former proteins likely apply to the latter as well. The general properties of the SARS-CoV-2 E protein  
69 presumably match those of other coronaviral E proteins.

70 It was shown previously that E proteins may undergo post-translational modifications (PTMs)  
71 [16,17], but the role of these modifications is still not fully clear. The prominent examples of other viral  
72 proteins that may be also modified by palmitoylation are the coronaviral S protein, haemagglutinin  
73 (HA) protein of the influenza virus, Env proteins of retroviruses and filoviruses, and vaccinia virus 37  
74 kDa major envelope antigen (p37) [18–21]. Some results indicate that conserved cysteines SARS-CoV  
75 E and, presumably, their palmitoylation are functionally important for stability of the E protein and the  
76 overall virus production [22,23]. On the other hand, glycosylation shields viral proteins from  
77 recognition by immune system [24,25]. It is closely linked to the protein topology as modification can  
78 happen only in the lumen of endoplasmic reticulum. SARS-CoV and SARS-CoV-2 E proteins are  
79 predominantly inserted in the membrane with their C-termini in the cytoplasm and are not modified  
80 [22,26,27]; a minor fraction can be glycosylated under certain non-native conditions [22,27]. The role  
81 of this possible glycosylation of E proteins is not clear [17].

82 Only a small portion of the E protein expressed during infection is incorporated into the virion  
83 envelope; the rest is localized at the intracellular trafficking endoplasmic reticulum (ER)-Golgi region  
84 and mostly at the intermediate compartment between ER and Golgi apparatus (ERGIC) [23,26,28–31].  
85 ERGIC is composed of tubulovesicular membrane clusters, with many curved membrane regions [32].  
86 CoVs assemble and bud at the ERGIC, where the E protein may induce membrane curvature or aid in  
87 membrane scission [16,17]. Indeed, various recombinant CoVs lacking the gene for E exhibit an  
88 aberrant morphology, from which it can be concluded that the function of E is to induce membrane  
89 curvature of the viral envelope, thus allowing CoV particles to acquire their characteristic spherical

90 shape and morphology [29,33,34]. E protein was also shown to colocalize and interact with the M and  
91 N proteins[35,36] as well as with the N-terminus of nsp3 [37]. It increases the expression of the M and  
92 S proteins [38] and, together with M, affects processing, maturation and localization of S [28]. Finally,  
93 it can also interact with cellular proteins Bcl-xL [39], PALS1 [40,41] and others such as CWC27,  
94 AP3B1, ZC3H18, SLC44A2, BRD2 and BRD4 [42].

95 In the host membranes, E proteins oligomerize to form ion-conductive pores [43–46] that may  
96 be inhibited by hexamethylene amiloride (HMA) and amantadine [47–51]. Similar small proteins (60-  
97 120 residues), which oligomerize and form hydrophilic transmembrane pores or channels and disrupt a  
98 number of physiological characteristics of the cell, are called viroporins [52]. They are known to  
99 contribute to release of infectious enveloped virus particles from infected cells and/or to facilitate the  
100 penetration of the viruses into the cell. The most famous representative viroporins of highly pathogenic  
101 RNA viruses are human immunodeficiency virus type 1 (HIV-1) Viral protein U (Vpu) protein, hepatitis  
102 C virus p7 protein and influenza A virus matrix protein 2 (M2), which are involved in diverse processes  
103 such as virus entry, trafficking, assembly, inflammation and apoptosis [52]. The significant contribution  
104 of viroporins to the life cycle of viruses makes them a target for therapeutic interventions. In particular,  
105 M2 can be targeted by an FDA-approved inhibitor rimantadine [53]. Investigations have shown that  
106 SARS-CoV viruses, in which the channel activity is inhibited, were much less infectious and pathogenic  
107 [54].

108 Currently, several experimental structures of the E protein fragments are available  
109 [45,48,50,55,56]. In particular, it was shown that the protein contains a TM  $\alpha$ -helix and one (when in  
110 monomeric form and in detergent, [55]) or two (when in pentameric form, [56]) amphipathic  $\alpha$ -helices.  
111 Yet, experimental structure of the full-length wild type protein is not available at the moment, and the  
112 influence of PTMs on it hasn't been studied. Moreover, there is little data on behavior of monomeric E  
113 protein prior to its assembly into pentameric channels. In the present study, we applied molecular  
114 dynamics to study the behavior of monomeric E protein from SARS-CoV-2 and identified the effects  
115 of PTMs on the protein behavior. We have also observed that the protein induces curvature in the  
116 membranes, and is attracted to the curved regions. These findings may be helpful in development of  
117 anti-SARS-CoV-2 medications, and for understanding the function of viroporins in general.

118           **Results**

119           *Structure of the monomeric E protein*

120           E protein from SARS-CoV-2 is a 75 amino acid-long protein that may be palmitoylated and  
121 glycosylated *in vivo*. To assess the overall conformational space available to the protein, we conducted  
122 first an extensive coarse-grained (CG) simulation of unmodified E protein, followed by atomistic  
123 simulations of unmodified protein and CG simulations of the protein with modifications (Table S1).  
124 CG simulations are known to faithfully reproduce the major physicochemical properties of the studied  
125 macromolecules while providing a considerable speedup compared to atomistic simulations [57,58].

126           In accordance with expectations, the simulations revealed that the protein is very flexible with  
127 no particular tertiary structure (Figure 1B). Principal component analysis (PCA) shows that the first two  
128 components describe most of the structural variation (~64%, Figure 2) and correspond to motions of  
129 the helices H2 and H3 relative to each other and TMD near the membrane surface.

130           Atomistic simulations are considerably more computationally demanding, and thus the  
131 exhaustive sampling of the conformational space can take a prohibitively long time. Consequently, we  
132 simulated a number of atomistic trajectories starting from representative conformations from the CG  
133 simulation. We divided the CG trajectory snapshots into four clusters, and used the centroids of the  
134 clusters as the starting structures for atomistic simulations. For each starting structure, we obtained six  
135 trajectories of the E protein: three with the protein embedded in the model membrane containing POPC,  
136 and three with the membrane mimicking the natural ERGIC membrane (50% POPC, 25% POPE, 10%  
137 POPI, 5% POPS, 10% cholesterol). No qualitative differences were observed between the simulations  
138 conducted in these membranes. Overall, PCA shows that the atomistic simulations correspond to the  
139 CG simulation and display roughly the same conformational space available to the E protein  
140 (Figure 2B). Conformations observed in atomistic simulations are shown in the Supporting Figure S1.

141           Atomistic simulations also show that while the secondary structure of the E protein is largely  
142 conserved, the amphipathic  $\alpha$ -helices H2 and H3 may partially unfold, with H2 being more disordered  
143 (Figures 3 and S2). We observed both unfolding and refolding events. Overall, this observation is in  
144 agreement with NMR experiments [55,56].

145

146 *Position of the E protein elements relative to the membrane*

147 Figure 4 shows the average positions of the secondary structure elements of the E protein  
148 relative to the membrane surface. In all of the simulations, the TMD remained embedded in the  
149 membrane. H2 is deeply buried in the lipid headgroup region, whereas H3 is slightly removed from the  
150 membrane border, while still remaining in contact with it. In some atomistic trajectories, partial  
151 unbinding of H3 from the membrane is observed (Figure S3).

152 Interestingly, TMD, despite being a single transmembrane  $\alpha$ -helix, has a preferable orientation  
153 in the membrane (Figure 5). It is tilted at the angle of 25-40° in all of the simulations and has a strong  
154 orientational (azimuthal) preference, with phenylalanines Phe20, Phe23 and Phe26 oriented towards the  
155 N-terminal side. No robust effects of post-translational modifications on the orientation of TMD were  
156 observed (Table 1).

157 H2, as an amphipathic helix, also has a preferred orientation (Figure 6). Palmitoylation of the  
158 three cysteines, Cys40, Cys43 and Cys44, in different patterns changes the physicochemical properties  
159 of the helix and leads to its rotation around its axis (Figure 6, Table 1). The strongest effect on H2  
160 orientation is observed when Cys40 and Cys44 are palmitoylated simultaneously: the helix is rotated  
161 by  $\sim 32.2^\circ$  relative to its position in the unmodified protein. Other palmitoylated variants have  
162 intermediate orientations; the effects of palmitoylation of the three cysteine residues are not additive  
163 (Table 1).

164 Position of H3 was not significantly affected by palmitoylation. Yet, glycosylation of Asn66  
165 had a pronounced effect on its dynamics (Figure 7). In the unmodified protein, we observed two major  
166 orientations of H3: the first one with the hydrophobic residues Val62 and Leu65 facing the membrane,  
167 and the less frequent orientation almost completely opposite to it, with H3 stacking with H2 while being  
168 slightly above it (Figure 7). Glycosylation resulted in abolishment of the second orientation, presumably  
169 due to the potential steric conflict between the sugar moiety and H2 (Figure 7A,D); the helix was also  
170 slightly rotated in the most frequent orientation (Figure 7A,E).

171 *Induction of curvature by the E protein*

172 In all of the conducted simulations, we observed induction of curvature by the E protein: the  
173 membrane bends towards the side where the C-terminus is located (Figure 8A). The effect is also

174 observed in larger systems containing four E protein monomers in opposite orientations (Figure S4) and  
175 in atomistic simulations (Figure S5). Presumably, the curvature is induced by the amphipathic helices  
176 that embed into the adjacent leaflet and expand it.

177 To check whether the curvature is indeed induced by H2 and H3, we conducted additional  
178 simulations of artificial proteins consisting of only TMD or only H2 and H3 (Figure 8B,C). Isolated  
179 TMD was tilted in a way similar to that observed in the simulations of the full-length protein. The  
180 membrane was perturbed and thinned near the  $\alpha$ -helix (Figure 8B), presumably because of the polar  
181 residues on the respective sides (Glu8, Thr9, Thr11, Asn15, Ser16 at the N-terminal side, Thr30, Thr35  
182 at the C-terminal side). Isolated H2 and H3 curved the membrane in the same way as the full-length  
183 protein (Figure 8C). Thus, we conclude that the structural elements responsible for curvature induction  
184 by the E protein are the amphipathic helices of the C-terminal domain.

#### 185 *Dynamics of the E protein within curved membranes*

186 Having observed the induction of curvature by the E protein, we were also interested to check  
187 whether it has a preferable position in membranes that are already curved, such as the native ER, Golgi  
188 and ERGIC membranes, especially during the budding of VLPs. As a test system, we used artificially  
189 buckled membranes [59–62]. Irrespective of the starting positions, E protein monomers redistribute in  
190 the membranes so that the C-termini localize to the convex regions (Figure 9). The effect was observed  
191 both in the membranes buckled in a single direction (non-zero mean curvature, zero Gaussian curvature,  
192 Figure 9A) and in the membranes buckled in both directions (positive Gaussian curvature, Figure 9B).  
193 Thus, we conclude that the monomeric E protein is curvature-sensitive.

194

195



## 196 Discussion

197 Coronaviruses have relatively large genomes harboring tens of different genes. Understanding  
198 of their structures could help in development of efficient antiviral measures. Yet some of the CoV  
199 proteins are transmembrane, and some contain intrinsically disordered regions [63], at least until they  
200 become a part of a larger assembly. E protein has both properties: it has a TM segment, and it lacks  
201 tertiary structure in the monomeric form, becoming mostly ordered in the pentameric assembly. Its  
202 flexibility and numerous PTMs pose many problems for experimental studies, especially of the  
203 monomeric E protein. However, because it is small, and its properties are governed by basic  
204 physicochemical principles, it is a good subject for simulations.

205 Our results show that monomeric SARS-CoV-2 envelope protein has rich conformational  
206 dynamics strongly affected by post-translational modifications. The protein is organized as an  $\alpha$ -helical  
207 TMD and two amphipathic  $\alpha$ -helices H2 and H3, flanked by short disordered N- and C-termini.  
208 Whereas TMD is rigid and remains  $\alpha$ -helical throughout the trajectories, helices H2 and H3 may  
209 partially unfold. TMD, H2 and H3 mostly move freely relative to each other, so the monomeric E protein  
210 can be considered an intrinsically disordered protein. Yet, all of its  $\alpha$ -helices have preferred orientations  
211 relative to the membrane.

212 The TM  $\alpha$ -helix of the E protein is relatively long (28 amino acids,  $\sim 43$  Å), and there is a  
213 mismatch between the length of its hydrophobic segment and the thickness of the hydrophobic region  
214 of the relevant membranes. Tilting of TM helices is a common mechanism for accommodating such  
215 mismatch [64–68]. Accordingly, we find that E protein TMD is tilted at 25–40°, similarly to TMD in  
216 pentameric E protein [56] and in other viroporins (Table S2). It also has a preferred azimuthal rotation  
217 angle, similarly to WALP peptides [69,70], for which the results obtained with MD simulations were  
218 found to correspond well to those obtained in experiments [71]. However, the rotation angle of TMD  
219 in a free E protein monomer is opposite to that in the E protein pentamer. This is likely a consequence  
220 of the polar residues such as Glu8, Thr9, Thr11, Asn15, Ser16, Thr30 and Thr35 preferably facing the  
221 solvent in the monomer and interior of the channel in the pentamer.

222 One of the most potentially important findings is a strong dependence of the E protein structure  
223 on post-translational modifications. Previously, it was shown that palmitoylation is important for E

224 protein stability and overall assembly of VLPs, whereas the role of glycosylation is more elusive [17].  
225 Yet, experimental studies of the effects of PTMs on protein structure are hindered by difficulties in  
226 obtaining homogeneous samples with a desired PTM pattern; *in vivo*, palmitoylation is likely to be  
227 stochastic [72]. The proteins may be mutated to abolish the particular PTM, however this may also  
228 introduce unintended side effects. On the other hand, simulations allow for easier targeted testing of  
229 different defined combinations of PTMs.

230 Previous experimental studies of the E protein dealt with unmodified truncated variants. SARS-  
231 CoV E protein construct included residues 8 to 65, a His-tag and a linker; the cysteines were mutated  
232 to alanines, Asn66 was missing (Li et al 2014, Surya et al 2018). SARS-CoV-2 construct was even  
233 shorter (residues 8-38) and did not include the residues that could be modified (Mandala et al, 2020).  
234 Previous computational studies of the E protein also did not focus on the effects of PTM [11,73,74]. In  
235 this work, we found that the average orientation of H2 is strongly dependent on palmitoylation pattern,  
236 as the acyl chains act as anchors on the respective H2 cysteines and bring them closer to the membrane  
237 core. On the other hand, positioning of H3 is affected by glycosylation as the glycan acts as a buoy on  
238 H3 and prevents its interaction with H2. However, most or all of the E proteins *in vivo* are probably not  
239 glycosylated [27], so the possible role of this modification remains unclear. While we did not study the  
240 E protein in pentameric form, we believe that PTMs are likely to elicit effects in the assembled  
241 oligomers similar to those that we observe in monomers.

242 In the last part of our work, we focused on interactions of the E protein with curved membranes.  
243 Overall, membrane curvature is an important factor in cell physiology [75], being both generated and  
244 sensed by the major membrane constituents: lipids and proteins [76,77]. Some amphipathic  $\alpha$ -helices  
245 are known to generate curvature by creating the area difference between the two leaflets of the bilayer  
246 [78,79] or to act as curvature sensors [80,81].

247 Along with experiments, molecular dynamics simulations have also been fundamental in  
248 studies of curved membranes [57]. Earlier, simulations have been used to study repartitioning of both  
249 lipids and proteins in naturally and artificially curved membranes [59–62]; a prominent example is  
250 enrichment of cholesterol in the regions with negative curvature [59,61]. Another example is the  
251 influenza A M2 protein, for which both experiments and simulations show that its amphiphilic  $\alpha$ -helix

252 induces membrane curvature, which is important for VLP budding and membrane scission [82,83], and  
253 can act as a curvature sensor [62].

254 Here, we have found that the SARS-CoV-2 E protein can generate membrane curvature, and  
255 this function can be ascribed to the amphiphilic C-terminal domain ( $\alpha$ -helices H2 and H2). Such  
256 viroporin-generated curvature may stabilize the budding viral particle and promote its formation [75].  
257 We have also found that the monomeric E protein can act as a curvature sensor and localize with the C-  
258 terminus at the convex regions of the membrane. Given that the C-terminus of E is oriented towards the  
259 cytoplasm [27], the protein is likely to localize at the VLP budding sites and promote VLP budding.  
260 Concentration in these curved areas may promote formation of pentameric channels. The assembled  
261 channels are also likely to be curvature-sensitive due to their umbrella-like shape [11,56]. On the other  
262 hand, E protein is expected to be depleted at the concave inner surface of the VLP, in agreement with  
263 experimental data [23,26,28–31].

264

## 265 **Conclusions**

266 Our simulations show that the SARS-CoV-2 E protein in monomeric form has rich structural  
267 dynamics. They also highlight the importance of considering the effects of palmitoylation and  
268 glycosylation on the protein's structure. The obtained results are in accordance with experimental  
269 observations, while providing a detailed description of the E protein structure. Finally, our work  
270 showcases MD simulations as an important complementary technique allowing comprehensive inquiry  
271 in the case where the experiment is complicated: when the protein is partially disordered and may be  
272 differentially post-translationally modified.

273

274

275 **Acknowledgements**

276 We are grateful to Pavel Buslaev for advices on using the Martini force field. The authors  
277 gratefully acknowledge the computing time granted through JARA on the supercomputer JURECA at  
278 Forschungszentrum Jülich. I.G. was supported by the Ministry of Science and Higher Education of the  
279 Russian Federation (agreement #075-00337-20-03, project FSMG-2020-0003). V.G. and R.A. were  
280 supported by the Commissariat à l’Energie Atomique et aux Energies Alternatives (Institut de Biologie  
281 Structurale) – Helmholtz-Gemeinschaft Deutscher Forschungszentren (Forschungszentrum Jülich)  
282 Special Terms and Conditions 5.1 specific agreement.

283

284 **Author contributions**

285 I.G. designed and supervised the project; P.O. and V.G. helped with the project design;  
286 A.K. performed simulations with the help of P.O.; A.K. and I.G. analyzed the results and prepared the  
287 manuscript; P.O., R.A. and V.G. helped with data analysis and manuscript preparation.

288

289 **Competing interests**

290 The authors declare no competing interests.

291

292 **Additional information**

293 Supplementary information is available.

294 **Materials and methods**

295 *Model preparation*

296 As a starting structure for simulations of the monomeric SARS-CoV-2 E protein, we used the  
297 model prepared by Heo and Feig [11] ([https://github.com/feiglab/sars-cov-2-](https://github.com/feiglab/sars-cov-2-proteins/blob/master/Membrane/E_protein.pdb)  
298 [proteins/blob/master/Membrane/E\\_protein.pdb](https://github.com/feiglab/sars-cov-2-proteins/blob/master/Membrane/E_protein.pdb), accessed on September 1<sup>st</sup>, 2020). Atomistic structure  
299 was converted into coarse-grained Martini 3 representation [84] using *martinize*. DSSP [85,86] was  
300 used to assign the  $\alpha$ -helical secondary structure for TMD, H2 and H3. The CG model was inserted into  
301 the POPC lipid bilayer using *insane* [87]. The structure of the monomer with PTMs was constructed  
302 manually using PyMOL [88]. For further AA simulations, CG structures were converted to AA using  
303 *backward* [89] and inserted into POPC or the native-like mixed bilayer composed of  
304 POPC/POPE/POPI/POPS/CHOL in the proportion 10:5:2:1:2 using CHARMM-GUI [90].

305 In all simulations, the N- and C- termini, residues Lys, Arg, Asp and Glu, and lipids POPS and  
306 POPI were charged. The membranes were solvated with water; counter ions were added to neutralize  
307 the systems. The simulations were performed using periodic boundary conditions. All systems were  
308 energy minimized using the steepest descent method, equilibrated and simulated using GROMACS  
309 2019.5 (AA) and GROMACS 2020.1 (CG) [91]. To generate the buckled membranes, we compressed  
310 the bilayers in the *X*-dimension until reaching the desired strain by fixing the box size in these  
311 dimensions, while the membrane pressure coupling was turned off in the *X-Y* lateral dimensions.

312 *Simulation details*

313 CG and AA simulations were conducted using the leapfrog integrator with time steps of 20 and  
314 2 fs, at a reference temperature of 323 and 310 K, respectively, and at a reference pressure of 1 bar.  
315 Temperature was coupled using velocity rescale [92] and Nosé-Hoover [93] thermostats with coupling  
316 constant of 1 ps<sup>-1</sup>, respectively. Pressure was coupled with semiisotropic Parrinello-Rahman barostat  
317 [94] with relaxation time of 12 or 5 ps, respectively.

318 *CG simulations*

319 CG simulations were conducted using the beta version of Martini 3 force field with  
320 nonpolarizable water and optimized parameters for palmitoylated cysteines [95] and glycosylated  
321 asparagine [96] where needed. The center of mass of the reference structure was scaled with the scaling

322 matrix of the pressure coupling. The non-bonded pair list was updated every 20 steps with the cutoff of  
323 1.1 nm. Potentials shifted to zero at the cutoff of 1.1 nm and a reaction-field potential with  $\epsilon_{\text{rf}} = \infty$  were  
324 used for treatment of the van der Waals and electrostatics interactions.

### 325 *AA simulations*

326 AA simulations were conducted using the CHARMM36m force field [97]. The covalent bonds  
327 to hydrogens were constrained using the LINCS algorithm [98]. The non-bonded pair list was updated  
328 every 20 steps with the cutoff of 1.2 nm. Force-based switching function with the switching range of  
329 1.0–1.2 nm and particle mesh Ewald (PME) method with 0.12 nm Fourier grid spacing and 1.2 nm  
330 cutoff were used for treatment of the van der Waals and electrostatics interactions. The simulations  
331 were performed using JURECA [99].

### 332 *Analysis*

333 VMD [100] and in-house scripts were used for analysis of the TMD tilt angle ( $\alpha$ ) and rotational  
334 (azimuthal) angles ( $\beta$ ,  $\phi$ ,  $\psi$ ) of the TMD, H2 and H3. The tilt angle was defined as the angle between  
335 the TMD helix axis and the normal to the membrane (axis Z). The rotational angle was defined as the  
336 angle between the  $C_{\alpha}$  radial vector of a reference residue (Phe23, Cys43, Asn66) and the X-Z plane; the  
337 helix was aligned so that its axis was in the X-Z plane (Figures 5-7). We used the Ward's method from  
338 MDTraj [101] to group the dataset into 4 clusters based on pairwise RMSD of coordinates of backbone  
339 particles. Density distributions of TMD, H2 and H3 atoms were calculated using the *density* tool from  
340 GROMACS. The secondary structure in the E protein was monitored using the *Timeline* plugin (version  
341 2.3) for VMD[100]. PCA was performed on the positions of the  $C_{\alpha}$  atoms and backbone particles using  
342 the *covar* and *anaeig* tools from GROMACS. Average positions of the membrane boundaries were  
343 calculated using *g\_lomepro*, version 1.0.2 [102].

344

345

## References

- 346 [1] A.R. Fehr, S. Perlman, Coronaviruses: An Overview of Their Replication and Pathogenesis, in:  
347 H.J. Maier, E. Bickerton, P. Britton (Eds.), *Coronaviruses: Methods and Protocols*, Springer,  
348 New York, NY, 2015: pp. 1–23. [https://doi.org/10.1007/978-1-4939-2438-7\\_1](https://doi.org/10.1007/978-1-4939-2438-7_1).
- 349 [2] A.E. Gorbalenya, S.C. Baker, R.S. Baric, R.J. de Groot, C. Drosten, A.A. Gulyaeva, B.L.  
350 Haagmans, C. Lauber, A.M. Leontovich, B.W. Neuman, D. Penzar, S. Perlman, L.L.M. Poon,  
351 D.V. Samborskiy, I.A. Sidorov, I. Sola, J. Ziebuhr, Coronaviridae Study Group of the  
352 International Committee on Taxonomy of Viruses, The species Severe acute respiratory  
353 syndrome-related coronavirus : classifying 2019-nCoV and naming it SARS-CoV-2, *Nature*  
354 *Microbiology*. 5 (2020) 536–544. <https://doi.org/10.1038/s41564-020-0695-z>.
- 355 [3] J. Cui, F. Li, Z.-L. Shi, Origin and evolution of pathogenic coronaviruses, *Nature Reviews*  
356 *Microbiology*. 17 (2019) 181–192. <https://doi.org/10.1038/s41579-018-0118-9>.
- 357 [4] B. Hu, H. Guo, P. Zhou, Z.-L. Shi, Characteristics of SARS-CoV-2 and COVID-19, *Nature*  
358 *Reviews Microbiology*. (2020) 1–14. <https://doi.org/10.1038/s41579-020-00459-7>.
- 359 [5] M. Bárcena, C.O. Barnes, M. Beck, P.J. Bjorkman, B. Canard, G.F. Gao, Y. Gao, R.  
360 Hilgenfeld, G. Hummer, A. Patwardhan, G. Santoni, E.O. Saphire, C. Schaffitzel, S.L.  
361 Schendel, J.L. Smith, A. Thorn, D. Veesler, P. Zhang, Q. Zhou, Structural biology in the fight  
362 against COVID-19, *Nature Structural & Molecular Biology*. 28 (2021) 2–7.  
363 <https://doi.org/10.1038/s41594-020-00544-8>.
- 364 [6] P.R. Arantes, A. Saha, G. Palermo, Fighting COVID-19 Using Molecular Dynamics  
365 Simulations, *ACS Cent. Sci*. 6 (2020) 1654–1656. <https://doi.org/10.1021/acscentsci.0c01236>.
- 366 [7] A.J. Mulholland, R.E. Amaro, COVID19 - Computational Chemists Meet the Moment, *J.*  
367 *Chem. Inf. Model*. 60 (2020) 5724–5726. <https://doi.org/10.1021/acs.jcim.0c01395>.
- 368 [8] M.I. Zimmerman, J.R. Porter, M.D. Ward, S. Singh, N. Vithani, A. Meller, U.L.  
369 Mallimadugula, C.E. Kuhn, J.H. Borowsky, R.P. Wiewiora, M.F.D. Hurley, A.M. Harbison,  
370 C.A. Fogarty, J.E. Coffland, E. Fadda, V.A. Voelz, J.D. Chodera, G.R. Bowman, SARS-CoV-  
371 2 Simulations Go Exascale to Capture Spike Opening and Reveal Cryptic Pockets Across the  
372 Proteome, *BioRxiv*. (2020) 2020.06.27.175430. <https://doi.org/10.1101/2020.06.27.175430>.
- 373 [9] L. Casalino, Z. Gaieb, J.A. Goldsmith, C.K. Hjorth, A.C. Dommer, A.M. Harbison, C.A.  
374 Fogarty, E.P. Barros, B.C. Taylor, J.S. McLellan, E. Fadda, R.E. Amaro, Beyond Shielding:  
375 The Roles of Glycans in the SARS-CoV-2 Spike Protein, *ACS Cent. Sci*. 6 (2020) 1722–1734.  
376 <https://doi.org/10.1021/acscentsci.0c01056>.
- 377 [10] A. Yu, A.J. Pak, P. He, V. Monje-Galvan, L. Casalino, Z. Gaieb, A.C. Dommer, R.E. Amaro,  
378 G.A. Voth, A multiscale coarse-grained model of the SARS-CoV-2 virion, *Biophysical*  
379 *Journal*. 0 (2020). <https://doi.org/10.1016/j.bpj.2020.10.048>.
- 380 [11] L. Heo, M. Feig, Modeling of Severe Acute Respiratory Syndrome Coronavirus 2 (SARS-  
381 CoV-2) Proteins by Machine Learning and Physics-Based Refinement, *BioRxiv*. (2020)  
382 2020.03.25.008904. <https://doi.org/10.1101/2020.03.25.008904>.
- 383 [12] J. Chodera, A.A. Lee, N. London, F. von Delft, Crowdsourcing drug discovery for pandemics,  
384 *Nature Chemistry*. 12 (2020) 581–581. <https://doi.org/10.1038/s41557-020-0496-2>.
- 385 [13] T.C.M. Consortium, H. Achdout, A. Aimon, E. Bar-David, H. Barr, A. Ben-Shmuel, J.  
386 Bennett, M.L. Bobby, J. Brun, B. Sarma, M. Calmiano, A. Carbery, E. Cattermole, J.D.  
387 Chodera, A. Clyde, J.E. Coffland, G. Cohen, J. Cole, A. Contini, L. Cox, M. Cvitkovic, A.  
388 Dias, A. Douangamath, S. Duberstein, T. Dudgeon, L. Dunnett, P.K. Eastman, N. Erez, M.  
389 Fairhead, D. Fearon, O. Fedorov, M. Ferla, H. Foster, R. Foster, R. Gabizon, P. Gehrtz, C.  
390 Gileadi, C. Giroud, W.G. Glass, R. Glen, I. Glinert, M. Gorichko, T. Gorrie-Stone, E.J.  
391 Griffen, J. Heer, M. Hill, S. Horrell, M.F.D. Hurley, T. Israely, A. Jajack, E. Jnoff, T. John,  
392 A.L. Kantsadi, P.W. Kenny, J.L. Kiappes, L. Koekemoer, B. Kovar, T. Krojer, A.A. Lee, B.A.  
393 Lefker, H. Levy, N. London, P. Lukacik, H.B. Macdonald, B. MacLean, T.R. Malla, T.  
394 Matviuk, W. McCorkindale, S. Melamed, O. Michurin, H. Mikolajek, A. Morris, G.M.  
395 Morris, M.J. Morwitzer, D. Moustakas, J.B. Neto, V. Oleinikovas, G.J. Overheul, D. Owen, R.  
396 Pai, J. Pan, N. Paran, B. Perry, M. Pingle, J. Pinjari, B. Politi, A. Powell, V. Psenak, R. Puni,  
397 V.L. Rangel, R.N. Reddi, S.P. Reid, E. Resnick, M.C. Robinson, R.P. Robinson, D. Rufa, C.  
398 Schofield, A. Shaikh, J. Shi, K. Shurrush, A. Sittner, R. Skyner, A. Smalley, M.D. Smilova, J.

- 399 Spencer, C. Strain-Damerell, V. Swamy, H. Tamir, R. Tennant, A. Thompson, W. Thompson,  
400 S. Tomasio, A. Tumber, I. Vakonakis, R.P. van Rij, F.S. Varghese, M. Vaschetto, E.B. Vitner,  
401 V. Voelz, A. von Delft, F. von Delft, M. Walsh, W. Ward, C. Weatherall, S. Weiss, C.F. Wild,  
402 M. Wittmann, N. Wright, Y. Yahalom-Ronen, D. Zaidmann, H. Zidane, N. Zitzmann, COVID  
403 Moonshot: Open Science Discovery of SARS-CoV-2 Main Protease Inhibitors by Combining  
404 Crowdsourcing, High-Throughput Experiments, Computational Simulations, and Machine  
405 Learning, *BioRxiv*. (2020) 2020.10.29.339317. <https://doi.org/10.1101/2020.10.29.339317>.
- 406 [14] P.S. Masters, *The Molecular Biology of Coronaviruses*, in: *Advances in Virus Research*,  
407 Academic Press, 2006: pp. 193–292. [https://doi.org/10.1016/S0065-3527\(06\)66005-3](https://doi.org/10.1016/S0065-3527(06)66005-3).
- 408 [15] J.L. Nieto-Torres, M.L. DeDiego, C. Verdiá-Báguena, J.M. Jimenez-Guardeño, J.A. Regla-  
409 Nava, R. Fernandez-Delgado, C. Castaño-Rodriguez, A. Alcaraz, J. Torres, V.M. Aguilera, L.  
410 Enjuanes, Severe Acute Respiratory Syndrome Coronavirus Envelope Protein Ion Channel  
411 Activity Promotes Virus Fitness and Pathogenesis, *PLOS Pathogens*. 10 (2014) e1004077.  
412 <https://doi.org/10.1371/journal.ppat.1004077>.
- 413 [16] T.R. Ruch, C.E. Machamer, The Coronavirus E Protein: Assembly and Beyond, *Viruses*. 4  
414 (2012) 363–382. <https://doi.org/10.3390/v4030363>.
- 415 [17] D. Schoeman, B.C. Fielding, Coronavirus envelope protein: current knowledge, *Virology*  
416 *Journal*. 16 (2019) 69. <https://doi.org/10.1186/s12985-019-1182-0>.
- 417 [18] C.M. Petit, V.N. Chouljenko, A. Iyer, R. Colgrove, M. Farzan, D.M. Knipe, K.G. Kousoulas,  
418 Palmitoylation of the cysteine-rich endodomain of the SARS–coronavirus spike glycoprotein is  
419 important for spike-mediated cell fusion, *Virology*. 360 (2007) 264–274.  
420 <https://doi.org/10.1016/j.virol.2006.10.034>.
- 421 [19] Y. Fujiwara, H.X. Kondo, M. Shiota, M. Kobayashi, K. Takeshita, A. Nakagawa, Y.  
422 Okamura, K. Kinoshita, Structural basis for the membrane association of ankyrinG via  
423 palmitoylation, *Scientific Reports*. 6 (2016) 23981. <https://doi.org/10.1038/srep23981>.
- 424 [20] J. Sobocińska, P. Roszczenko-Jasińska, A. Ciesielska, K. Kwiatkowska, Protein Palmitoylation  
425 and Its Role in Bacterial and Viral Infections, *Front. Immunol.* 8 (2018).  
426 <https://doi.org/10.3389/fimmu.2017.02003>.
- 427 [21] J.A. Boscarino, H.L. Logan, J.J. Lacny, T.M. Gallagher, Envelope Protein Palmitoylations Are  
428 Crucial for Murine Coronavirus Assembly, *Journal of Virology*. 82 (2008) 2989–2999.  
429 <https://doi.org/10.1128/JVI.01906-07>.
- 430 [22] Q. Yuan, Y. Liao, J. Torres, J.P. Tam, D.X. Liu, Biochemical and functional characterization  
431 of the membrane association and membrane permeabilizing activity of the severe acute  
432 respiratory syndrome coronavirus envelope protein, *Virology*. 349 (2006) 264–275.  
433 <https://doi.org/10.1016/j.virol.2006.01.028>.
- 434 [23] L.A. Lopez, A.J. Riffle, S.L. Pike, D. Gardner, B.G. Hogue, Importance of Conserved Cysteine  
435 Residues in the Coronavirus Envelope Protein, *Journal of Virology*. 82 (2008) 3000–3010.  
436 <https://doi.org/10.1128/JVI.01914-07>.
- 437 [24] O.C. Grant, D. Montgomery, K. Ito, R.J. Woods, Analysis of the SARS-CoV-2 spike protein  
438 glycan shield reveals implications for immune recognition, *Scientific Reports*. 10 (2020)  
439 14991. <https://doi.org/10.1038/s41598-020-71748-7>.
- 440 [25] J.D. Marth, P.K. Grewal, Mammalian glycosylation in immunity, *Nature Reviews*  
441 *Immunology*. 8 (2008) 874–887. <https://doi.org/10.1038/nri2417>.
- 442 [26] J.L. Nieto-Torres, M.L. DeDiego, E. Álvarez, J.M. Jiménez-Guardeño, J.A. Regla-Nava, M.  
443 Llorente, L. Kremer, S. Shuo, L. Enjuanes, Subcellular location and topology of severe acute  
444 respiratory syndrome coronavirus envelope protein, *Virology*. 415 (2011) 69–82.  
445 <https://doi.org/10.1016/j.virol.2011.03.029>.
- 446 [27] G. Duart, M.J. García-Murria, B. Grau, J.M. Acosta-Cáceres, L. Martínez-Gil, I. Mingarro,  
447 SARS-CoV-2 envelope protein topology in eukaryotic membranes, *Open Biology*. 10 (2020)  
448 200209. <https://doi.org/10.1098/rsob.200209>.
- 449 [28] B. Boson, V. Legros, B. Zhou, E. Siret, C. Mathieu, F.-L. Cosset, D. Lavillette, S. Denolly,  
450 The SARS-CoV-2 envelope and membrane proteins modulate maturation and retention of the  
451 spike protein, allowing assembly of virus-like particles, *Journal of Biological Chemistry*. 296  
452 (2021). <https://doi.org/10.1074/jbc.RA120.016175>.



- 453 [29] J.R. Cohen, L.D. Lin, C.E. Machamer, Identification of a Golgi Complex-Targeting Signal in  
454 the Cytoplasmic Tail of the Severe Acute Respiratory Syndrome Coronavirus Envelope  
455 Protein, *Journal of Virology*. 85 (2011) 5794–5803. <https://doi.org/10.1128/JVI.00060-11>.
- 456 [30] M. Godet, R. L'Haridon, J.-F. Vautherot, H. Laude, TGEV corona virus ORF4 encodes a  
457 membrane protein that is incorporated into virions, *Virology*. 188 (1992) 666–675.  
458 [https://doi.org/10.1016/0042-6822\(92\)90521-P](https://doi.org/10.1016/0042-6822(92)90521-P).
- 459 [31] P. Venkatagopalan, S.M. Daskalova, L.A. Lopez, K.A. Dolezal, B.G. Hogue, Coronavirus  
460 envelope (E) protein remains at the site of assembly, *Virology*. 478 (2015) 75–85.  
461 <https://doi.org/10.1016/j.virol.2015.02.005>.
- 462 [32] C. Appenzeller-Herzog, H.-P. Hauri, The ER-Golgi intermediate compartment (ERGIC): in  
463 search of its identity and function, *Journal of Cell Science*. 119 (2006) 2173–2183.  
464 <https://doi.org/10.1242/jcs.03019>.
- 465 [33] J. Ortego, J.E. Ceriani, C. Patiño, J. Plana, L. Enjuanes, Absence of E protein arrests  
466 transmissible gastroenteritis coronavirus maturation in the secretory pathway, *Virology*. 368  
467 (2007) 296–308. <https://doi.org/10.1016/j.virol.2007.05.032>.
- 468 [34] F. Fischer, C.F. Stegen, P.S. Masters, W.A. Samsonoff, Analysis of Constructed E Gene  
469 Mutants of Mouse Hepatitis Virus Confirms a Pivotal Role for E Protein in Coronavirus  
470 Assembly, *Journal of Virology*. 72 (1998) 7885–7894. <https://doi.org/10.1128/JVI.72.10.7885-7894.1998>.
- 471 [35] E. Corse, C.E. Machamer, The cytoplasmic tails of infectious bronchitis virus E and M  
472 proteins mediate their interaction, *Virology*. 312 (2003) 25–34. [https://doi.org/10.1016/S0042-6822\(03\)00175-2](https://doi.org/10.1016/S0042-6822(03)00175-2).
- 473 [36] Y.-T. Tseng, S.-M. Wang, K.-J. Huang, C.-T. Wang, SARS-CoV envelope protein  
474 palmitoylation or nucleocapid association is not required for promoting virus-like particle  
475 production, *Journal of Biomedical Science*. 21 (2014) 34. <https://doi.org/10.1186/1423-0127-21-34>.
- 476 [37] E. Álvarez, M.L. DeDiego, J.L. Nieto-Torres, J.M. Jiménez-Guardeño, L. Marcos-Villar, L.  
477 Enjuanes, The envelope protein of severe acute respiratory syndrome coronavirus interacts  
478 with the non-structural protein 3 and is ubiquitinated, *Virology*. 402 (2010) 281–291.  
479 <https://doi.org/10.1016/j.virol.2010.03.015>.
- 480 [38] R. Xu, M. Shi, J. Li, P. Song, N. Li, Construction of SARS-CoV-2 Virus-Like Particles by  
481 Mammalian Expression System, *Front. Bioeng. Biotechnol.* 8 (2020).  
482 <https://doi.org/10.3389/fbioe.2020.00862>.
- 483 [39] Y. Yang, Z. Xiong, S. Zhang, Y. Yan, J. Nguyen, B. Ng, H. Lu, J. Brendese, F. Yang, H.  
484 Wang, X.-F. Yang, Bcl-xL inhibits T-cell apoptosis induced by expression of SARS  
485 coronavirus E protein in the absence of growth factors, *Biochemical Journal*. 392 (2005) 135–  
486 143. <https://doi.org/10.1042/BJ20050698>.
- 487 [40] K.-T. Teoh, Y.-L. Siu, W.-L. Chan, M.A. Schlüter, C.-J. Liu, J.S.M. Peiris, R. Bruzzone, B.  
488 Margolis, B. Nal, The SARS coronavirus E protein interacts with PALS1 and alters tight  
489 junction formation and epithelial morphogenesis, *Mol Biol Cell*. 21 (2010) 3838–3852.  
490 <https://doi.org/10.1091/mbc.E10-04-0338>.
- 491 [41] A. Toto, S. Ma, F. Malagrino, L. Visconti, L. Pagano, K. Stromgaard, S. Gianni, Comparing  
492 the binding properties of peptides mimicking the Envelope protein of SARS-CoV and SARS-  
493 CoV-2 to the PDZ domain of the tight junction-associated PALS1 protein, *Protein Science*. 29  
494 (2020) 2038–2042. <https://doi.org/10.1002/pro.3936>.
- 495 [42] D.E. Gordon, G.M. Jang, M. Bouhaddou, J. Xu, K. Obernier, K.M. White, M.J. O'Meara, V.V.  
496 Rezelj, J.Z. Guo, D.L. Swaney, T.A. Tummino, R. Hüttenhain, R.M. Kaake, A.L. Richards, B.  
497 Tutuncuoglu, H. Foussard, J. Batra, K. Haas, M. Modak, M. Kim, P. Haas, B.J. Polacco, H.  
498 Braberg, J.M. Fabius, M. Eckhardt, M. Soucheray, M.J. Bennett, M. Cakir, M.J. McGregor, Q.  
499 Li, B. Meyer, F. Roesch, T. Vallet, A. Mac Kain, L. Miorin, E. Moreno, Z.Z.C. Naing, Y.  
500 Zhou, S. Peng, Y. Shi, Z. Zhang, W. Shen, I.T. Kirby, J.E. Melnyk, J.S. Chorbha, K. Lou, S.A.  
501 Dai, I. Barrio-Hernandez, D. Memon, C. Hernandez-Armenta, J. Lyu, C.J.P. Mathy, T. Perica,  
502 K.B. Pilla, S.J. Ganesan, D.J. Saltzberg, R. Rakesh, X. Liu, S.B. Rosenthal, L. Calviello, S.  
503 Venkataramanan, J. Liboy-Lugo, Y. Lin, X.-P. Huang, Y. Liu, S.A. Wankowicz, M. Bohn, M.  
504 Safari, F.S. Ugur, C. Koh, N.S. Savar, Q.D. Tran, D. Shengjuler, S.J. Fletcher, M.C. O'Neal,  
505  
506  
507

- 508 Y. Cai, J.C.J. Chang, D.J. Broadhurst, S. Klippsten, P.P. Sharp, N.A. Wenzell, D. Kuzuoglu-  
509 Ozturk, H.-Y. Wang, R. Trenker, J.M. Young, D.A. Cavero, J. Hiatt, T.L. Roth, U. Rathore, A.  
510 Subramanian, J. Noack, M. Hubert, R.M. Stroud, A.D. Frankel, O.S. Rosenberg, K.A. Verba,  
511 D.A. Agard, M. Ott, M. Emerman, N. Jura, M. von Zastrow, E. Verdin, A. Ashworth, O.  
512 Schwartz, C. d'Enfert, S. Mukherjee, M. Jacobson, H.S. Malik, D.G. Fujimori, T. Ideker, C.S.  
513 Craik, S.N. Floor, J.S. Fraser, J.D. Gross, A. Sali, B.L. Roth, D. Ruggero, J. Taunton, T.  
514 Kortemme, P. Beltrao, M. Vignuzzi, A. García-Sastre, K.M. Shokat, B.K. Shoichet, N.J.  
515 Krogan, A SARS-CoV-2 protein interaction map reveals targets for drug repurposing, *Nature*.  
516 583 (2020) 459–468. <https://doi.org/10.1038/s41586-020-2286-9>.
- 517 [43] C. Verdià-Báguena, J.L. Nieto-Torres, A. Alcaraz, M.L. DeDiego, J. Torres, V.M. Aguilella,  
518 L. Enjuanes, Coronavirus E protein forms ion channels with functionally and structurally-  
519 involved membrane lipids, *Virology*. 432 (2012) 485–494.  
520 <https://doi.org/10.1016/j.virol.2012.07.005>.
- 521 [44] K. Parthasarathy, L. Ng, X. Lin, D.X. Liu, K. Pervushin, X. Gong, J. Torres, Structural  
522 Flexibility of the Pentameric SARS Coronavirus Envelope Protein Ion Channel, *Biophysical*  
523 *Journal*. 95 (2008) L39–L41. <https://doi.org/10.1529/biophysj.108.133041>.
- 524 [45] W. Surya, Y. Li, C. Verdià-Báguena, V.M. Aguilella, J. Torres, MERS coronavirus envelope  
525 protein has a single transmembrane domain that forms pentameric ion channels, *Virus*  
526 *Research*. 201 (2015) 61–66. <https://doi.org/10.1016/j.virusres.2015.02.023>.
- 527 [46] P.P. Singh Tomar, I.T. Arkin, SARS-CoV-2 E protein is a potential ion channel that can be  
528 inhibited by Gliclazide and Memantine, *Biochemical and Biophysical Research*  
529 *Communications*. 530 (2020) 10–14. <https://doi.org/10.1016/j.bbrc.2020.05.206>.
- 530 [47] L. Wilson, P. Gage, G. Ewart, Hexamethylene amiloride blocks E protein ion channels and  
531 inhibits coronavirus replication, *Virology*. 353 (2006) 294–306.  
532 <https://doi.org/10.1016/j.virol.2006.05.028>.
- 533 [48] K. Pervushin, E. Tan, K. Parthasarathy, X. Lin, F.L. Jiang, D. Yu, A. Vararattanavech, T.W.  
534 Soong, D.X. Liu, J. Torres, Structure and Inhibition of the SARS Coronavirus Envelope  
535 Protein Ion Channel, *PLOS Pathogens*. 5 (2009) e1000511.  
536 <https://doi.org/10.1371/journal.ppat.1000511>.
- 537 [49] J. Torres, U. Maheswari, K. Parthasarathy, L. Ng, D.X. Liu, X. Gong, Conductance and  
538 amantadine binding of a pore formed by a lysine-flanked transmembrane domain of SARS  
539 coronavirus envelope protein, *Protein Science*. 16 (2007) 2065–2071.  
540 <https://doi.org/10.1110/ps.062730007>.
- 541 [50] V.S. Mandala, M.J. McKay, A.A. Shcherbakov, A.J. Dregni, A. Kolocouris, M. Hong,  
542 Structure and drug binding of the SARS-CoV-2 envelope protein transmembrane domain in  
543 lipid bilayers, *Nat Struct Mol Biol*. 27 (2020) 1202–1208. [https://doi.org/10.1038/s41594-020-](https://doi.org/10.1038/s41594-020-00536-8)  
544 [00536-8](https://doi.org/10.1038/s41594-020-00536-8).
- 545 [51] J. To, W. Surya, J. Torres, Chapter Eight - Targeting the Channel Activity of Viroporins, in: R.  
546 Donev (Ed.), *Advances in Protein Chemistry and Structural Biology*, Academic Press, 2016:  
547 pp. 307–355. <https://doi.org/10.1016/bs.apcsb.2015.12.003>.
- 548 [52] J.L. Nieva, V. Madan, L. Carrasco, Viroporins: structure and biological functions, *Nature*  
549 *Reviews Microbiology*. 10 (2012) 563–574. <https://doi.org/10.1038/nrmicro2820>.
- 550 [53] T. Jefferson, J. Deeks, V. Demicheli, D. Rivetti, M. Rudin, Amantadine and rimantadine for  
551 preventing and treating influenza A in adults, *Cochrane Database of Systematic Reviews*.  
552 (2004). <https://doi.org/10.1002/14651858.CD001169.pub2>.
- 553 [54] J.L. Nieto-Torres, C. Verdià-Báguena, J.M. Jimenez-Guardeño, J.A. Regla-Nava, C. Castaño-  
554 Rodríguez, R. Fernandez-Delgado, J. Torres, V.M. Aguilella, L. Enjuanes, Severe acute  
555 respiratory syndrome coronavirus E protein transports calcium ions and activates the NLRP3  
556 inflammasome, *Virology*. 485 (2015) 330–339. <https://doi.org/10.1016/j.virol.2015.08.010>.
- 557 [55] Y. Li, W. Surya, S. Claudine, J. Torres, Structure of a Conserved Golgi Complex-targeting  
558 Signal in Coronavirus Envelope Proteins, *Journal of Biological Chemistry*. 289 (2014) 12535–  
559 12549. <https://doi.org/10.1074/jbc.M114.560094>.
- 560 [56] W. Surya, Y. Li, J. Torres, Structural model of the SARS coronavirus E channel in LMPG  
561 micelles, *Biochimica et Biophysica Acta (BBA) - Biomembranes*. 1860 (2018) 1309–1317.  
562 <https://doi.org/10.1016/j.bbamem.2018.02.017>.

- 563 [57] S.J. Marrink, A.H. de Vries, D.P. Tieleman, Lipids on the move: Simulations of membrane  
564 pores, domains, stalks and curves, *Biochim. Biophys. Acta.* 1788 (2009) 149–168.  
565 <https://doi.org/10.1016/j.bbamem.2008.10.006>.
- 566 [58] P. Buslaev, I. Gushchin, Effects of Coarse Graining and Saturation of Hydrocarbon Chains on  
567 Structure and Dynamics of Simulated Lipid Molecules, *Scientific Reports.* 7 (2017) 11476.  
568 <https://doi.org/10.1038/s41598-017-11761-5>.
- 569 [59] K.J. Boyd, N.N. Alder, E.R. May, Buckling Under Pressure: Curvature-Based Lipid  
570 Segregation and Stability Modulation in Cardiolipin-Containing Bilayers, *Langmuir.* 33 (2017)  
571 6937–6946. <https://doi.org/10.1021/acs.langmuir.7b01185>.
- 572 [60] F. Elías-Wolff, M. Lindén, A.P. Lyubartsev, E.G. Brandt, Computing Curvature Sensitivity of  
573 Biomolecules in Membranes by Simulated Buckling, *J. Chem. Theory Comput.* 14 (2018)  
574 1643–1655. <https://doi.org/10.1021/acs.jctc.7b00878>.
- 575 [61] S. Baoukina, H.I. Ingólfsson, S.J. Marrink, D.P. Tieleman, Curvature-Induced Sorting of  
576 Lipids in Plasma Membrane Tethers, *Advanced Theory and Simulations.* 1 (2018) 1800034.  
577 <https://doi.org/10.1002/adts.201800034>.
- 578 [62] J.J. Madsen, J.M.A. Grime, J.S. Rossman, G.A. Voth, Entropic forces drive clustering and  
579 spatial localization of influenza A M2 during viral budding, *PNAS.* 115 (2018) E8595–E8603.  
580 <https://doi.org/10.1073/pnas.1805443115>.
- 581 [63] R. Giri, T. Bhardwaj, M. Shegane, B.R. Gehi, P. Kumar, K. Gadhave, C.J. Oldfield, V.N.  
582 Uversky, Understanding COVID-19 via comparative analysis of dark proteomes of SARS-  
583 CoV-2, human SARS and bat SARS-like coronaviruses, *Cell. Mol. Life Sci.* (2020).  
584 <https://doi.org/10.1007/s00018-020-03603-x>.
- 585 [64] S.H. Park, S.J. Opella, Tilt Angle of a Trans-membrane Helix is Determined by Hydrophobic  
586 Mismatch, *Journal of Molecular Biology.* 350 (2005) 310–318.  
587 <https://doi.org/10.1016/j.jmb.2005.05.004>.
- 588 [65] S.K. Kandasamy, R.G. Larson, Molecular Dynamics Simulations of Model Trans-Membrane  
589 Peptides in Lipid Bilayers: A Systematic Investigation of Hydrophobic Mismatch, *Biophysical*  
590 *Journal.* 90 (2006) 2326–2343. <https://doi.org/10.1529/biophysj.105.073395>.
- 591 [66] S. Özdirekcan, C. Etchebest, J.A. Killian, P.F.J. Fuchs, On the Orientation of a Designed  
592 Transmembrane Peptide: Toward the Right Tilt Angle?, *J. Am. Chem. Soc.* 129 (2007)  
593 15174–15181. <https://doi.org/10.1021/ja073784q>.
- 594 [67] K.C. Duong-Ly, V. Nanda, W.F. DeGrado, K.P. Howard, The conformation of the pore region  
595 of the M2 proton channel depends on lipid bilayer environment, *Protein Science.* 14 (2005)  
596 856–861. <https://doi.org/10.1110/ps.041185805>.
- 597 [68] R.B.M. Koehorst, R.B. Spruijt, F.J. Vergeldt, M.A. Hemminga, Lipid Bilayer Topology of the  
598 Transmembrane  $\alpha$ -Helix of M13 Major Coat Protein and Bilayer Polarity Profile by Site-  
599 Directed Fluorescence Spectroscopy, *Biophysical Journal.* 87 (2004) 1445–1455.  
600 <https://doi.org/10.1529/biophysj.104.043208>.
- 601 [69] A. Holt, J.A. Killian, Orientation and dynamics of transmembrane peptides: the power of  
602 simple models, *Eur Biophys J.* 39 (2010) 609–621. [https://doi.org/10.1007/s00249-009-0567-](https://doi.org/10.1007/s00249-009-0567-1)  
603 [1](https://doi.org/10.1007/s00249-009-0567-1).
- 604 [70] T. Kim, W. Im, Revisiting Hydrophobic Mismatch with Free Energy Simulation Studies of  
605 Transmembrane Helix Tilt and Rotation, *Biophysical Journal.* 99 (2010) 175–183.  
606 <https://doi.org/10.1016/j.bpj.2010.04.015>.
- 607 [71] E. Strandberg, S. Esteban-Martín, A.S. Ulrich, J. Salgado, Hydrophobic mismatch of mobile  
608 transmembrane helices: Merging theory and experiments, *Biochimica et Biophysica Acta*  
609 *(BBA) - Biomembranes.* 1818 (2012) 1242–1249.  
610 <https://doi.org/10.1016/j.bbamem.2012.01.023>.
- 611 [72] R.N.P. Rodenburg, J. Snijder, M. van de Waterbeemd, A. Schouten, J. Granneman, A.J.R.  
612 Heck, P. Gros, Stochastic palmitoylation of accessible cysteines in membrane proteins  
613 revealed by native mass spectrometry, *Nature Communications.* 8 (2017) 1280.  
614 <https://doi.org/10.1038/s41467-017-01461-z>.
- 615 [73] M. Sarkar, S. Saha, Structural insight into the role of novel SARS-CoV-2 E protein: A  
616 potential target for vaccine development and other therapeutic strategies, *PLOS ONE.* 15  
617 (2020) e0237300. <https://doi.org/10.1371/journal.pone.0237300>.

- 618 [74] Y. Cao, R. Yang, W. Wang, I. Lee, R. Zhang, W. Zhang, J. Sun, B. Xu, X. Meng,  
619 Computational Study of the Ion and Water Permeation and Transport Mechanisms of the  
620 SARS-CoV-2 Pentameric E Protein Channel, *Front. Mol. Biosci.* 7 (2020).  
621 <https://doi.org/10.3389/fmolb.2020.565797>.
- 622 [75] H.T. McMahon, E. Boucrot, Membrane curvature at a glance, *J Cell Sci.* 128 (2015) 1065–  
623 1070. <https://doi.org/10.1242/jcs.114454>.
- 624 [76] T.R. Graham, M.M. Kozlov, Interplay of proteins and lipids in generating membrane  
625 curvature, *Current Opinion in Cell Biology.* 22 (2010) 430–436.  
626 <https://doi.org/10.1016/j.ceb.2010.05.002>.
- 627 [77] T. Baumgart, B.R. Capraro, C. Zhu, S.L. Das, Thermodynamics and Mechanics of Membrane  
628 Curvature Generation and Sensing by Proteins and Lipids, *Annu. Rev. Phys. Chem.* 62 (2011)  
629 483–506. <https://doi.org/10.1146/annurev.physchem.012809.103450>.
- 630 [78] I.K. Jarsch, F. Daste, J.L. Gallop, Membrane curvature in cell biology: An integration of  
631 molecular mechanisms, *Journal of Cell Biology.* 214 (2016) 375–387.  
632 <https://doi.org/10.1083/jcb.201604003>.
- 633 [79] F. Campelo, H.T. McMahon, M.M. Kozlov, The Hydrophobic Insertion Mechanism of  
634 Membrane Curvature Generation by Proteins, *Biophysical Journal.* 95 (2008) 2325–2339.  
635 <https://doi.org/10.1529/biophysj.108.133173>.
- 636 [80] G. Drin, J.-F. Casella, R. Gautier, T. Boehmer, T.U. Schwartz, B. Antonny, A general  
637 amphipathic  $\alpha$ -helical motif for sensing membrane curvature, *Nature Structural & Molecular*  
638 *Biology.* 14 (2007) 138–146. <https://doi.org/10.1038/nsmb1194>.
- 639 [81] H. Cui, E. Lyman, G.A. Voth, Mechanism of Membrane Curvature Sensing by Amphipathic  
640 Helix Containing Proteins, *Biophysical Journal.* 100 (2011) 1271–1279.  
641 <https://doi.org/10.1016/j.bpj.2011.01.036>.
- 642 [82] N.W. Schmidt, G.C.L. Wong, Antimicrobial peptides and induced membrane curvature:  
643 Geometry, coordination chemistry, and molecular engineering, *Current Opinion in Solid State*  
644 *and Materials Science.* 17 (2013) 151–163. <https://doi.org/10.1016/j.cossms.2013.09.004>.
- 645 [83] J.S. Rossman, X. Jing, G.P. Leser, R.A. Lamb, Influenza Virus M2 Protein Mediates ESCRT-  
646 Independent Membrane Scission, *Cell.* 142 (2010) 902–913.  
647 <https://doi.org/10.1016/j.cell.2010.08.029>.
- 648 [84] P.C.T. Souza, S. Thallmair, P. Conflitti, C. Ramírez-Palacios, R. Alessandri, S. Raniolo, V.  
649 Limongelli, S.J. Marrink, Protein–ligand binding with the coarse-grained Martini model,  
650 *Nature Communications.* 11 (2020) 3714. <https://doi.org/10.1038/s41467-020-17437-5>.
- 651 [85] W.G. Touw, C. Baakman, J. Black, T.A.H. te Beek, E. Krieger, R.P. Joosten, G. Vriend, A  
652 series of PDB-related databanks for everyday needs, *Nucleic Acids Research.* 43 (2015)  
653 D364–D368. <https://doi.org/10.1093/nar/gku1028>.
- 654 [86] W. Kabsch, C. Sander, Dictionary of protein secondary structure: Pattern recognition of  
655 hydrogen-bonded and geometrical features, *Biopolymers.* 22 (1983) 2577–2637.  
656 <https://doi.org/10.1002/bip.360221211>.
- 657 [87] T.A. Wassenaar, H.I. Ingólfsson, R.A. Böckmann, D.P. Tieleman, S.J. Marrink, Computational  
658 Lipidomics with insane: A Versatile Tool for Generating Custom Membranes for Molecular  
659 Simulations, *J. Chem. Theory Comput.* 11 (2015) 2144–2155.  
660 <https://doi.org/10.1021/acs.jctc.5b00209>.
- 661 [88] W.L. DeLano, The PyMOL molecular graphics system, (2002).
- 662 [89] T.A. Wassenaar, K. Pluhackova, R.A. Böckmann, S.J. Marrink, D.P. Tieleman, Going  
663 Backward: A Flexible Geometric Approach to Reverse Transformation from Coarse Grained to  
664 Atomistic Models, *J. Chem. Theory Comput.* 10 (2014) 676–690.  
665 <https://doi.org/10.1021/ct400617g>.
- 666 [90] S. Jo, T. Kim, V.G. Iyer, W. Im, CHARMM-GUI: A web-based graphical user interface for  
667 CHARMM, *J. Comput. Chem.* 29 (2008) 1859–1865. <https://doi.org/10.1002/jcc.20945>.
- 668 [91] M.J. Abraham, T. Murtola, R. Schulz, S. Páll, J.C. Smith, B. Hess, E. Lindahl, GROMACS:  
669 High performance molecular simulations through multi-level parallelism from laptops to  
670 supercomputers, *SoftwareX.* 1–2 (2015) 19–25. <https://doi.org/10.1016/j.softx.2015.06.001>.
- 671 [92] G. Bussi, D. Donadio, M. Parrinello, Canonical sampling through velocity rescaling, *J. Chem.*  
672 *Phys.* 126 (2007) 014101. <https://doi.org/10.1063/1.2408420>.

- 673 [93] S. Nosé, A unified formulation of the constant temperature molecular dynamics methods, *J.*  
674 *Chem. Phys.* 81 (1984) 511–519. <https://doi.org/10.1063/1.447334>.
- 675 [94] M. Parrinello, A. Rahman, Polymorphic transitions in single crystals: A new molecular  
676 dynamics method, *J. Appl. Phys.* 52 (1981) 7182–7190. <https://doi.org/10.1063/1.328693>.
- 677 [95] Y. Atsmon-Raz, D.P. Tieleman, Parameterization of Palmitoylated Cysteine, Farnesylated  
678 Cysteine, Geranylgeranylated Cysteine, and Myristoylated Glycine for the Martini Force Field,  
679 *J. Phys. Chem. B.* 121 (2017) 11132–11143. <https://doi.org/10.1021/acs.jpcc.7b10175>.
- 680 [96] A.T. Shivgan, J.K. Marzinek, R.G. Huber, A. Krah, R.H. Henchman, P. Matsudaira, C.S.  
681 Verma, P.J. Bond, Extending the Martini Coarse-Grained Force Field to N-Glycans, *J. Chem.*  
682 *Inf. Model.* 60 (2020) 3864–3883. <https://doi.org/10.1021/acs.jcim.0c00495>.
- 683 [97] J. Huang, S. Rauscher, G. Nawrocki, T. Ran, M. Feig, B.L. de Groot, H. Grubmüller, A.D.  
684 MacKerell, CHARMM36m: an improved force field for folded and intrinsically disordered  
685 proteins, *Nat. Methods.* 14 (2017) 71–73. <https://doi.org/10.1038/nmeth.4067>.
- 686 [98] B. Hess, H. Bekker, H. Berendsen, J. Fraaije, LINCS: A linear constraint solver for molecular  
687 simulations, *J. Comput. Chem.* 18 (1997) 1463–1472. [https://doi.org/10.1002/\(sici\)1096-](https://doi.org/10.1002/(sici)1096-987x(199709)18:12%3C1463::aid-jcc4%3E3.0.co;2-h)  
688 [987x\(199709\)18:12%3C1463::aid-jcc4%3E3.0.co;2-h](https://doi.org/10.1002/(sici)1096-987x(199709)18:12%3C1463::aid-jcc4%3E3.0.co;2-h).
- 689 [99] D. Krause, P. Thörnig, JURECA: Modular supercomputer at Jülich Supercomputing Centre,  
690 *Journal of Large-Scale Research Facilities JLSRF.* 4 (2018) 132. [https://doi.org/10.17815/jlsrf-](https://doi.org/10.17815/jlsrf-4-121-1)  
691 [4-121-1](https://doi.org/10.17815/jlsrf-4-121-1).
- 692 [100] W. Humphrey, A. Dalke, K. Schulten, VMD Visual molecular dynamics, *Journal of Molecular*  
693 *Graphics.* 14 (1996) 33–38. [https://doi.org/10.1016/0263-7855\(96\)00018-5](https://doi.org/10.1016/0263-7855(96)00018-5).
- 694 [101] R.T. McGibbon, K.A. Beauchamp, M.P. Harrigan, C. Klein, J.M. Swails, C.X. Hernández,  
695 C.R. Schwantes, L.-P. Wang, T.J. Lane, V.S. Pande, MDTraj: A Modern Open Library for the  
696 Analysis of Molecular Dynamics Trajectories, *Biophysical Journal.* 109 (2015) 1528–1532.  
697 <https://doi.org/10.1016/j.bpj.2015.08.015>.
- 698 [102] V. Gapsys, B.L. de Groot, R. Briones, Computational analysis of local membrane properties, *J*  
699 *Comput Aided Mol Des.* 27 (2013) 845–858. <https://doi.org/10.1007/s10822-013-9684-0>.
- 700

701

702 **Table 1.** Average values and standard deviations ( $\sigma$ ) of the tilt and rotation angles of TMD and  
 703 H2 observed in different simulations. See Figures 5 and 6 for definitions.

| Type | System           | Lipid | Mean<br>$\alpha, ^\circ$ | $\sigma_\alpha,$<br>$^\circ$ | Mean<br>$\beta, ^\circ$ | $\sigma_\beta,$<br>$^\circ$ | Mean<br>$\phi, ^\circ$ | $\Delta\phi, ^\circ$ | $\sigma_\phi, ^\circ$ |
|------|------------------|-------|--------------------------|------------------------------|-------------------------|-----------------------------|------------------------|----------------------|-----------------------|
| CG   | No PTM           | POPC  | 26.9                     | 8                            | 34.1                    | 29.4                        | 77.7                   |                      | 22.5                  |
| CG   | CYSP40           | POPC  | 26.6                     | 8.9                          | 34.7                    | 31.2                        | 85.4                   | +7.7                 | 20.5                  |
| CG   | CYSP43           | POPC  | 26.7                     | 8.4                          | 32.4                    | 29                          | 79.3                   | +1.6                 | 19.7                  |
| CG   | CYSP44           | POPC  | 27.1                     | 8.3                          | 40.3                    | 28.8                        | 106.6                  | +28.9                | 19.1                  |
| CG   | CYSP40/43        | POPC  | 27.7                     | 8.9                          | 34.8                    | 30.9                        | 80.4                   | +2.7                 | 20.4                  |
| CG   | CYSP40/44        | POPC  | 26.1                     | 8.6                          | 42.9                    | 26.5                        | 109.9                  | +32.2                | 19.6                  |
| CG   | CYSP43/44        | POPC  | 26.9                     | 8                            | 36.6                    | 31.1                        | 96.8                   | +19.1                | 17.6                  |
| CG   | CYSP40/43/44     | POPC  | 26.4                     | 8.3                          | 31.2                    | 30.4                        | 103                    | +25.3                | 17.2                  |
| CG   | ASNG66           | POPC  | 26.2                     | 8.5                          | 38.7                    | 26.9                        | 78.6                   | +0.9                 | 22.5                  |
| CG   | TMD, no PTM      | POPC  | 25.5                     | 7.7                          | 29.4                    | 31.4                        | -                      | -                    | -                     |
| CG   | H2+H3,<br>no PTM | POPC  | -                        | -                            | -                       | -                           | 82.3                   | +4.6                 | 26.4                  |
| AA   | No PTM           | POPC  | 40.2                     | 9.9                          | 48.1                    | 22.6                        | 85.3                   |                      | 49.2                  |
| AA   | No PTM           | Mix   | 32.6                     | 11.6                         | 50.5                    | 27.2                        | 83.7                   |                      | 32.6                  |

704

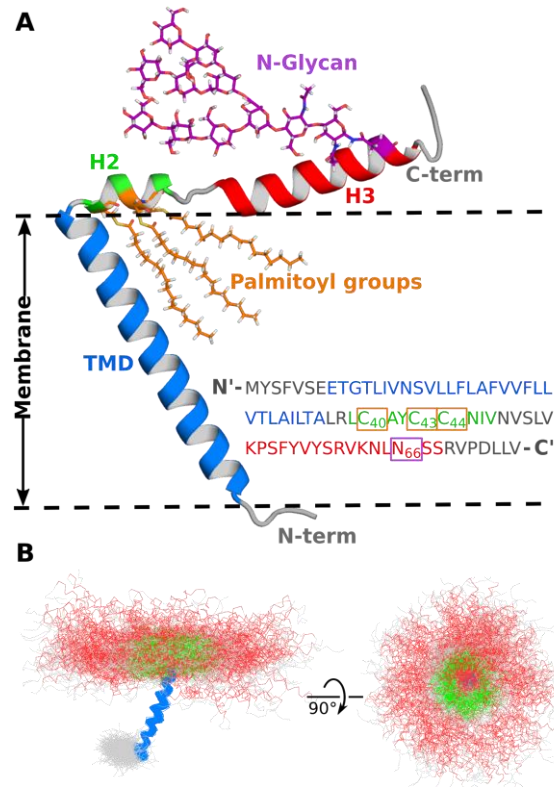

705

706

707

708

709

710

711

**Figure 1.** Structure of the SARS-CoV-2 envelope (E) protein monomer with possible post-translational modifications. (A) Schematic model showing a fully palmitoylated and glycosylated E protein. Transmembrane domain (TMD) is shown in blue and amphipathic helices H2 and H3 are shown in green and red. (B) Conformations of the unmodified E protein observed in coarse-grained simulations. Positions of the transmembrane helix were aligned for clarity; helices H2 and H3 are mobile.

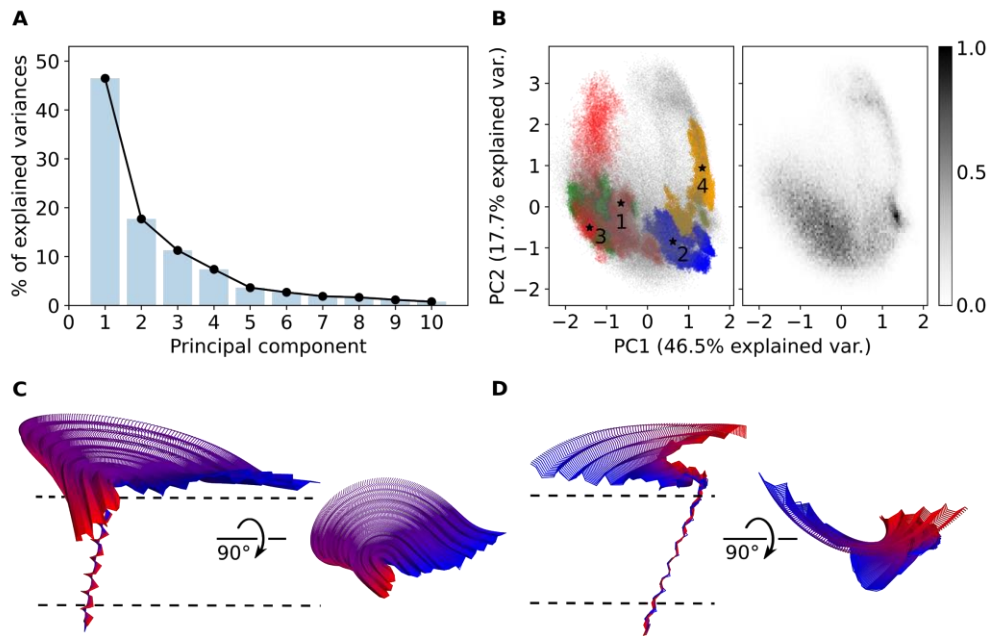

712

713

**Figure 2.** Comparison of the E protein conformations observed in atomistic and coarse-grained

714 simulations using principal component analysis. (A) The scree plot for the top ten PCA eigenvalues.

715 First two components describe ~64% of structural variations. (B) Comparison of the conformational

716 ensembles observed in AA (colored) and CG (gray) simulations projected onto PC1 and PC2. The data

717 for CG simulations only are shown on the right. Starting conformations for AA simulations are shown

718 are labelled with stars. Trajectories from the first, second, third and fourth sets of AA simulations are

719 shown in red, blue, green and orange, respectively. (C) Conformational changes associated with PC1.

720 (D) Conformational changes associated with PC2. The structures are colored from blue to red according

721 to the PC projection value. Approximate membrane position is shown with lines.

722



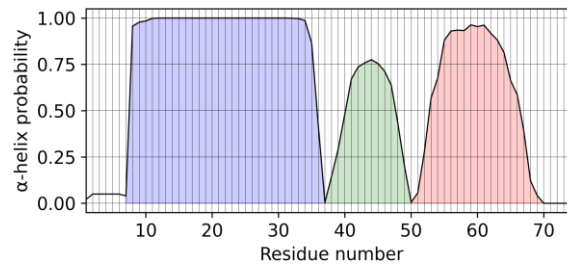

723

724 **Figure 3.** Conservation of the secondary structure of the E protein in AA MD simulations.

725 Average probability of observing the  $\alpha$ -helical structure for each residue is shown. TMD remains fully

726  $\alpha$ -helical, whereas H2 and H3 can be sometimes disordered (H2 more often compared to H3).

727

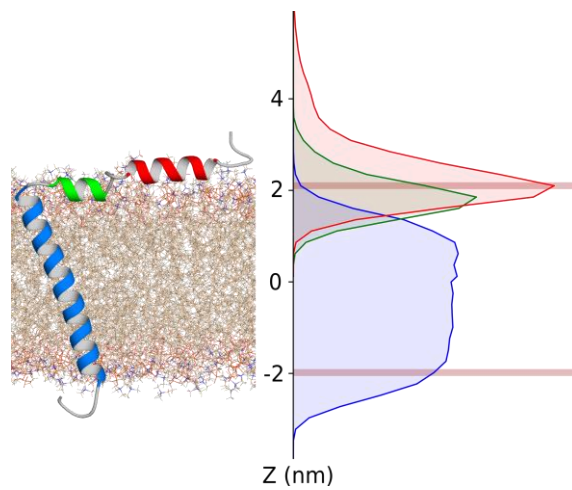

728

729

730

731

732

**Figure 4.** Average positions of TMD, H2 and H3 relative to the membrane in all atom simulations. Average positions of lipid phosphate groups are shown using brown lines. Distributions of TMD, H2 and H3 backbone atoms' positions are shown in blue, green and red, respectively.

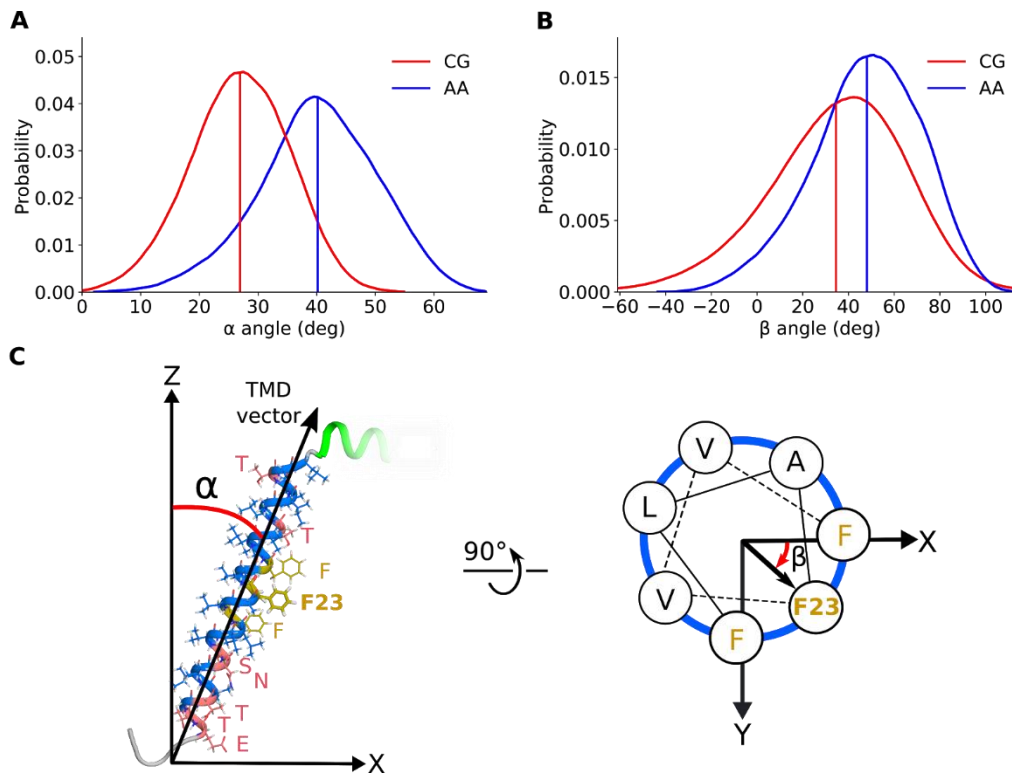

733

734

735 **Figure 5.** Orientation of TMD in POPC bilayer in coarse-grained (CG) and all atom (AA)

736 simulations. A) Distributions of the tilt angles. B) Distributions of the axial rotation angles. Vertical

737 lines indicate average values. C) Definitions of the tilt ( $\alpha$ ) and axial rotation ( $\beta$ ) angles.

738

739

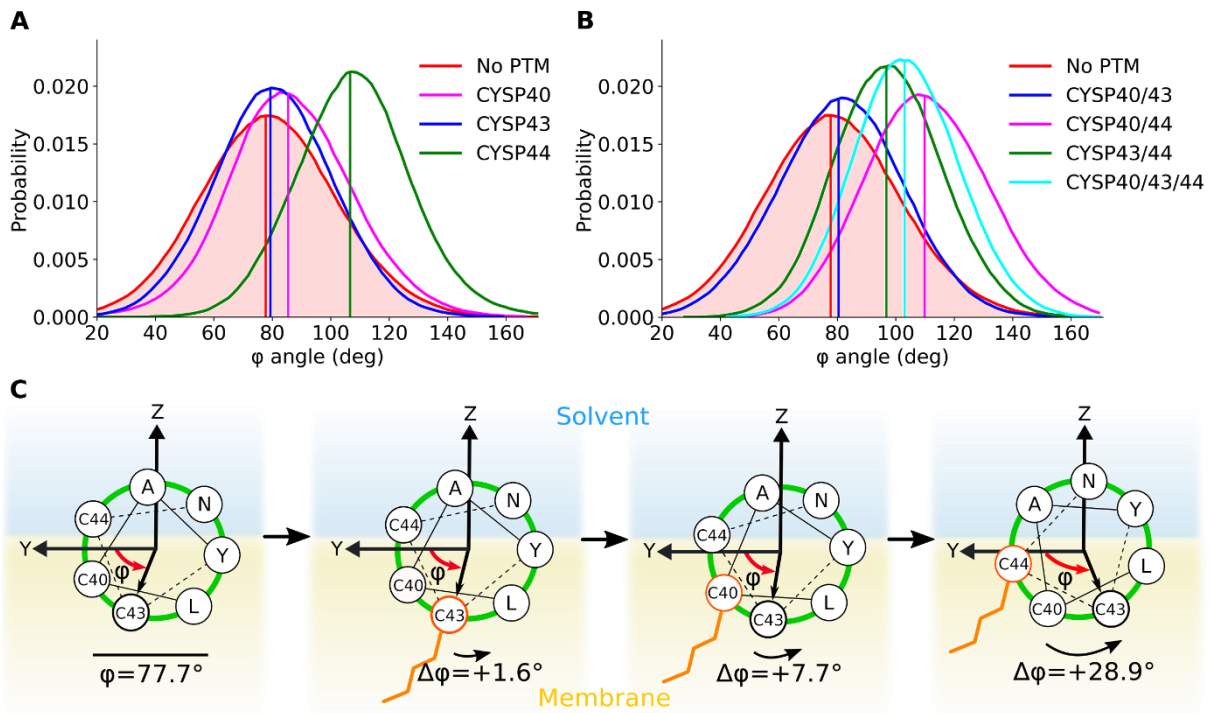

740

741 **Figure 6.** Effects of palmitoylation on orientation of the helix H2 relative to the membrane.

742 Rotation of Cys43 relative to the membrane plane ( $\mathbf{Y}$ ) viewed from the N-terminus is analyzed. (A) and

743 (B) Distributions for the Cys43 rotation angles relative to the membrane plane for different PTMs.

744 Vertical lines indicate average values. (C) Schematics showing the H2 orientation with helical wheel

745 projections for selected variants. Palmitoylation affects the orientation of H2 because the respective

746 side chain becomes more hydrophobic.

747

748

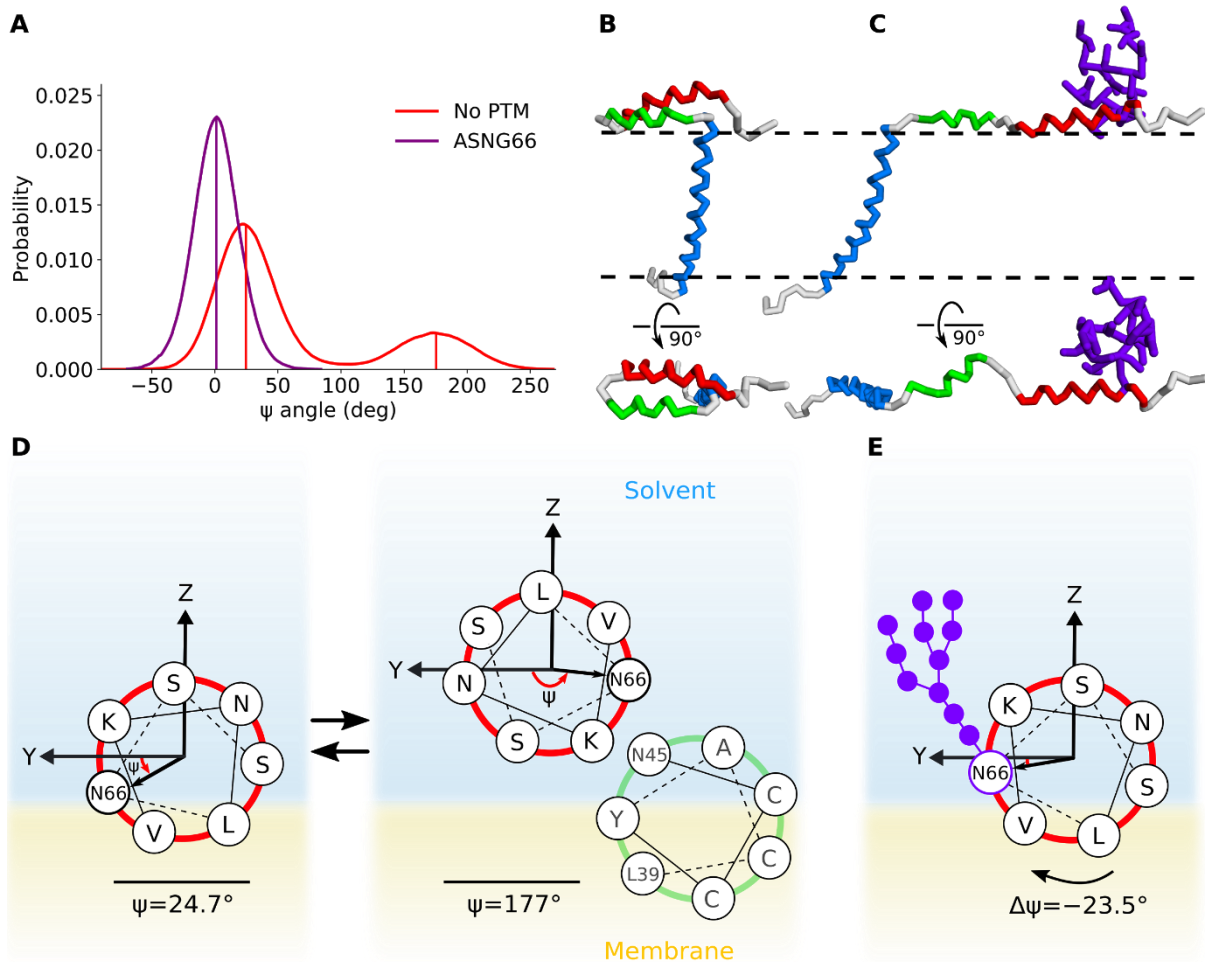

749

750 **Figure 7.** Effect of Asn66 glycosylation on orientation of the helix H3 relative to the membrane  
 751 in coarse-grained simulations. Rotation of Asn66 relative to the membrane plane (**Y**) viewed from the  
 752 N-terminus is analyzed. (A) Distributions for the Asn66 rotation angle relative to the membrane plane  
 753 for unmodified and glycosylated variants. Vertical lines indicate average values. (B) and (C)  
 754 Representative conformations for  $\psi \approx 0^\circ$  and  $\psi \approx 180^\circ$ . (D) and (E) Schematics showing the H3  
 755 orientation with helical wheel projections for unmodified and glycosylated variants. Glycosylation of  
 756 Asn66 precludes the configuration with  $\psi = 177^\circ$ .

757

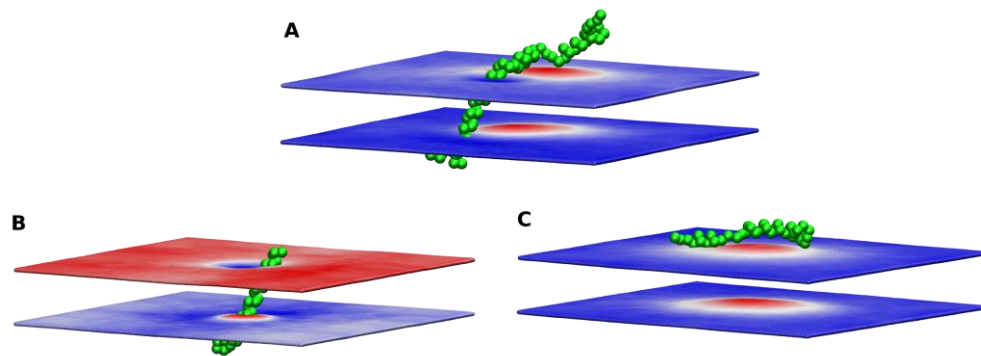

758

759

760

**Figure 8.** Induction of curvature by the E protein monomer in coarse grained simulations.

761

Upward displacement of each membrane boundary is shown in red, and downward displacement is

762

shown in blue. (A) Induction of curvature by the full-length E protein. (B) Membrane deformation by

763

an isolated TMD. The membrane is thinned around the TMD, but no buckling is observed. (C)

764

Membrane deformation by isolated H2 and H3 helices in coarse grained simulation. The membrane is

765

bent towards the  $\alpha$ -helices H2 and H3. Each panel shows an exemplary protein position; positions of

766

the membrane boundaries are averaged over the trajectory length.

767

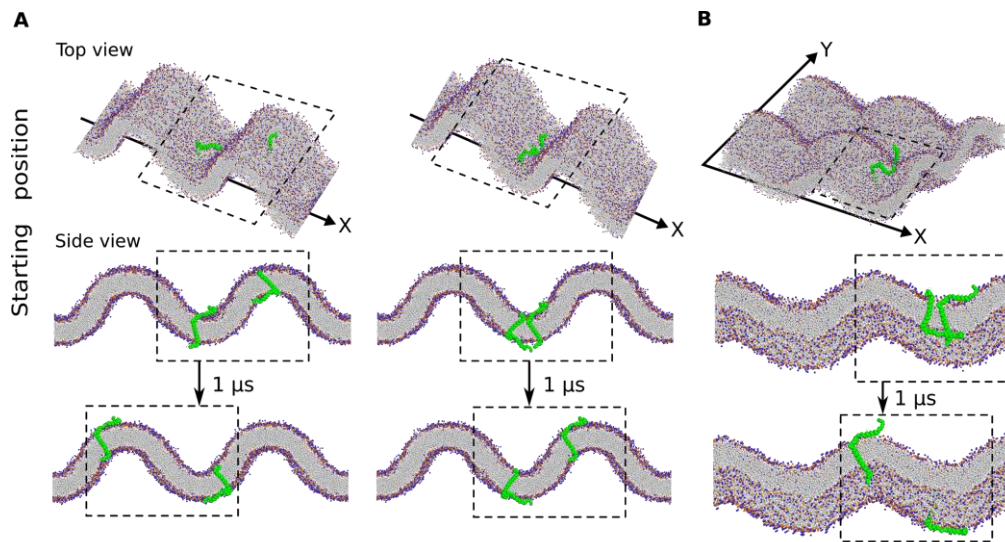

768

769

**Figure 9.** Monomeric E protein partitions into the curved region with the N-terminus localizing

770 to the concave side independent of the starting position. (A) Simulations with the membrane buckled in

771 one dimension. (B) Simulations with the membrane buckled in two dimensions. The dashed box shows

772 the unit cell of the simulation.

773
